# Supplementary material for: In Silico Characterization of Calcineurin from Pathogenic Obligate Intracellular Trypanosomatids: Potential New Biological Roles
Source: MDPI journal article supplement (doi:10.3390/biom11091322), 2021-09-07
Supplement: s1 [file s1]

| Table S1. ScanProsite Score hits by 1 profile (pattern PS00018*) |          |        |          |
|------------------------------------------------------------------|----------|--------|----------|
| Loop                                                             | HsCaNB-1 | TcCaNB | LsppCaNB |
| 1                                                                | 8181     | None   | 9855     |
| 2                                                                | 12840    | 8544   | 9018     |
| 3                                                                | 14402    | 13202  | 13621    |
| 4                                                                | 13286    | 10915  | 12589    |

\*EF-hand calcium-binding domain.

| Table S2. Myristoylator results                        |          |            |            |
|--------------------------------------------------------|----------|------------|------------|
| HsCaNB-1 = The protein is predicted as myristoylated   |          |            |            |
|                                                        | Positive | Negative   | Score      |
| Average response of 25 neural networks                 | 0.994907 | 0.00506406 | 0.98984294 |
| TcCaNB = The protein is predicted as non-myristoylated |          |            |            |
|                                                        | Positive | Negative   | Score      |
| Average response of 25 neural networks                 | 0.426957 | 0.573101   | -0.146144  |

A

Query = HsCaNB-1  
Sbjct = TcCaNB

| Score         | Expect                                                      | Method                                    | Identities  | Positives   | Gaps      |
|---------------|-------------------------------------------------------------|-------------------------------------------|-------------|-------------|-----------|
| 138 bits(348) | 6e-47                                                       | Compositional matrix adjust.              | 72/159(45%) | 99/159(62%) | 6/159(3%) |
| Query 1       | MGNEASY-PEM-----                                            | CSHFDADEIKRLGKRFKLDLDSGSLSVVEEFMSLPQLQNPL | 54          |             |           |
| Sbjct 1       | MGEGSSFTPEEMRQLREATAFSEAQIVRLQKRFATLAQGGGRLTAEALSSISSVASNPL | 60                                        |             |             |           |
| Query 55      | VQRFIDFDTGNGEVDFFKEFIEGVSVQSVKDGKEQKLRFAFRIYDMKDGYSINGELFQ  | 114                                       |             |             |           |
| Sbjct 61      | LGRVLAVLDTSGDGKIDFMTFAKALAVFSQADKRLRFTFKMYDVGDDGKISNKDLFE   | 120                                       |             |             |           |
| Query 115     | VLKMMVGNLKDQTLQQLQIVDKTIINADKDGGRISFEFF                     | 153                                       |             |             |           |
| Sbjct 121     | TLTIMGVTNLGVQLQQLQIVDKTFIEVDLNRDGYITFEFF                    | 159                                       |             |             |           |

B

Query = HsCaNB-1  
Sbjct = LsppCaNB

| Score         | Expect                                                        | Method                       | Identities  | Positives   | Gaps      |
|---------------|---------------------------------------------------------------|------------------------------|-------------|-------------|-----------|
| 149 bits(376) | 3e-51                                                         | Compositional matrix adjust. | 75/148(51%) | 99/148(66%) | 0/148(0%) |
| Query 19      | EIKRLGKRFKLDLDSGSLSVVEEFMSLPQLQNPLVQRFIDFDTGNGEVDFFKEFIEG     | 78                           |             |             |           |
| Sbjct 24      | QVQRLYKSFSLNKKSGKITRAEFNSIPALASNPLVDRVLAVMDTDGSDTVDFGDFVRA    | 83                           |             |             |           |
| Query 79      | VSQFSVKGDKKEQKLRFAFRIYDMKDGYSINGELFQVLKMMVGNLKDQTLQQLQIVDKTII | 138                          |             |             |           |
| Sbjct 84      | LAVLSSATSKEDKRLRFTFKMYDIDGGRISNKDLFQMLSINVGVLNSQMLQQLQIVDKTFI | 143                          |             |             |           |
| Query 139     | NADKDGGRISFEFFCAVVGGLDIHKM                                    | 166                          |             |             |           |
| Sbjct 144     | EADVDRDGYITFEFFQALAVNSDFGRL                                   | 171                          |             |             |           |

**Figure S1.** BLAST protein comparison of *HsCaNB-1* with *TcCaNB* (A) and *HsCaNB-1* with *LsppCaNB* (B) using Blast 2 sequences interface ([https://blast.ncbi.nlm.nih.gov/Blast.cgi?PROGRAM=blastp&PAGE\\_TYPE=BlastSearch&BLAST\\_SPEC=blast2seq&LINK\\_LOC=blasttab&LAST\\_PAGE=blastp&BLAST\\_INIT=blast2seq](https://blast.ncbi.nlm.nih.gov/Blast.cgi?PROGRAM=blastp&PAGE_TYPE=BlastSearch&BLAST_SPEC=blast2seq&LINK_LOC=blasttab&LAST_PAGE=blastp&BLAST_INIT=blast2seq))

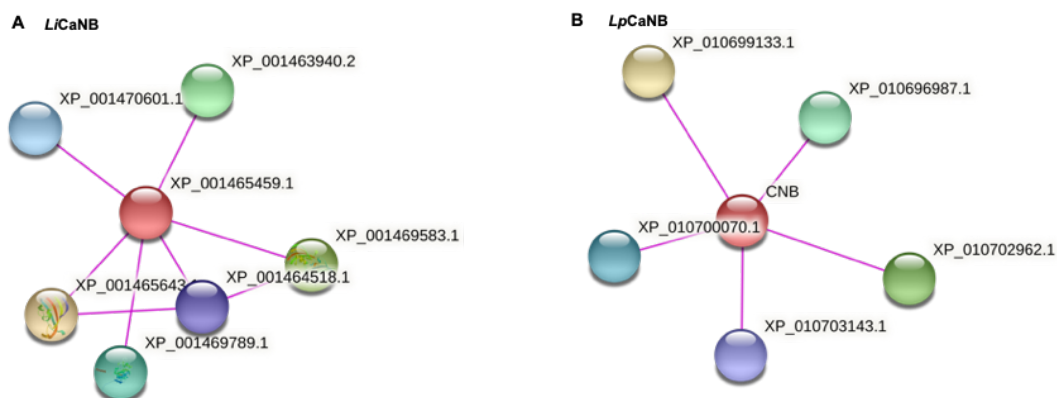

**Figure S2.** Protein-protein interaction network of the *Leishmania infantum* (LiCaNB) and *Leishmania panamensis* (LpCaNB) CaNB proteins (STRING V.11.0). The line indicates the type of interaction evidence (experimentally determined). Parameters: Score (high confidence 0.7), sources of interaction used: experimental and databases. In A: XP\_001465459.1 (Calcineurin B subunit, putative), XP\_001470601.1 (Serine/threonine protein phosphatase, putative), XP\_001463940.2 (Uncharacterized protein), XP\_001465643.1 (Peptidylprolyl isomerase, Fk506-binding protein 1-like protein), XP\_001469789.1 (Serine/threonine protein phosphatase 2B catalytic subunit A2, putative), XP\_001464518.1 (Uncharacterized protein) and in B: CNB (Calcineurin B subunit, putative), XP\_010699133.1 (Peptidylprolyl isomerase), XP\_010696987.1 (Serine/threonine-specific protein phosphatase, putative), XP\_010700070.1 (Serine/threonine-protein phosphatase), XP\_010703143.1 (Serine/threonine protein phosphatase 2B catalytic subunit A2, putative) and XP\_010702962.1 (Peptidylprolyl isomerase).

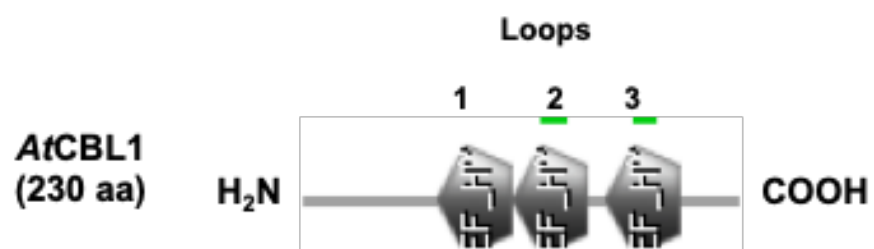

**Figure S3.** Protein domain architecture of calcineurin B-like of *Arabidopsis thaliana* (AtCBL1)
